# Supplementary material
Source: publisher site journal article supplement (https://www.dovepress.com/article/284163)

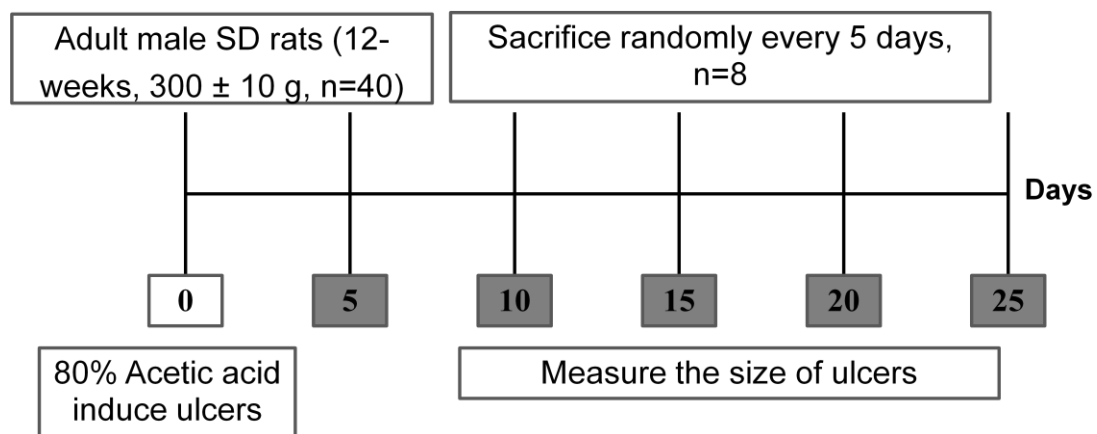

Figure S1. Induction of rats' gastric ulcers by acetic acid

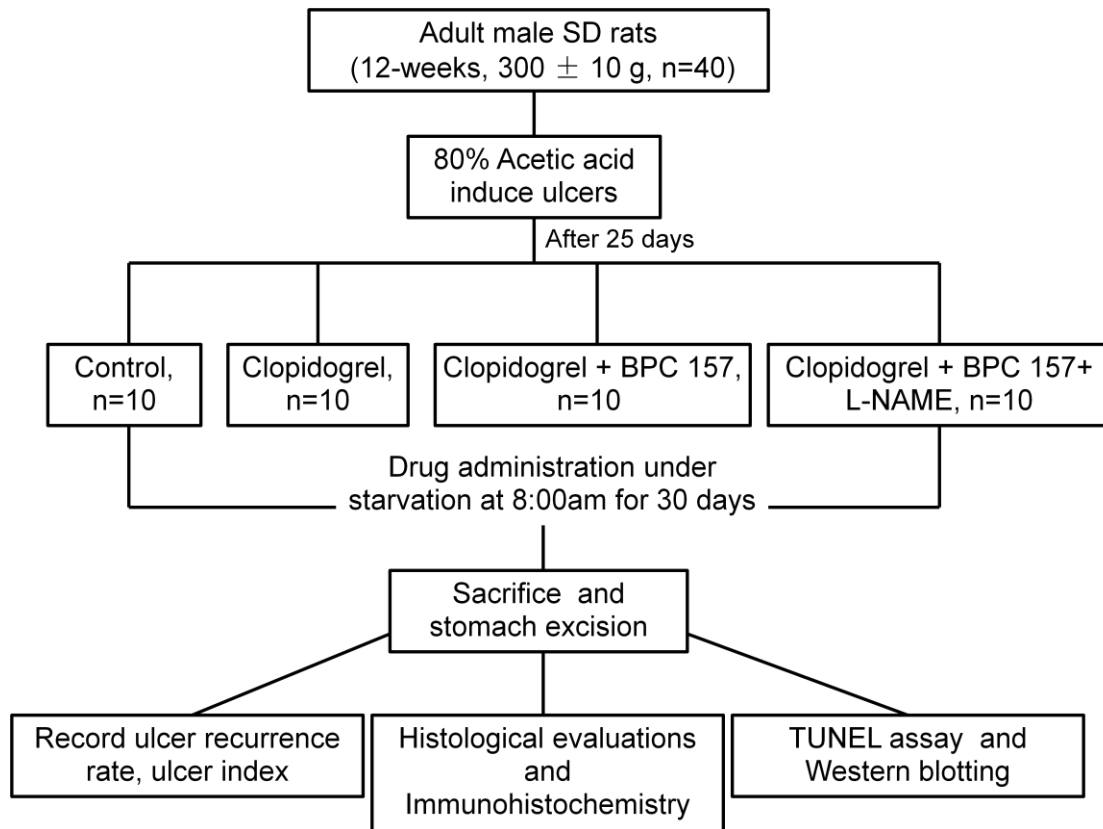

Figure S2. Animal experiment design

Supplement: Supplementary file 1 [file get_supplementary_file.php]
